# Supplementary material for: A Cl? anion-responsive luminescent Eu3+ complex with a chiral tripod: ligand substituent effects on ternary complex stoichiometry and anion sensing selectivity
Source: Royal Society of Chemistry journal article supplement (doi:10.1039/b703944a), 2007-01-01
Supplement: b703944a.pdf [file b703944a.pdf]

Supporting Information

**Cl<sup>-</sup> Anion-responsive luminescent Eu<sup>3+</sup> complex with chiral tripod:  
ligand substitution effects on ternary complex stoichiometry  
and anion sensing selectivity**

Yumiko Kataoka, Dharam Paul, Hiroyuki Miyake, Satoshi Shinoda  
and Hiroshi Tsukube\*

*Department of Chemistry, Graduate School of Science, Osaka City University, 3-3-138  
sugimoto, Sumiyoshi-ku, Osaka 558-8585, Japan*

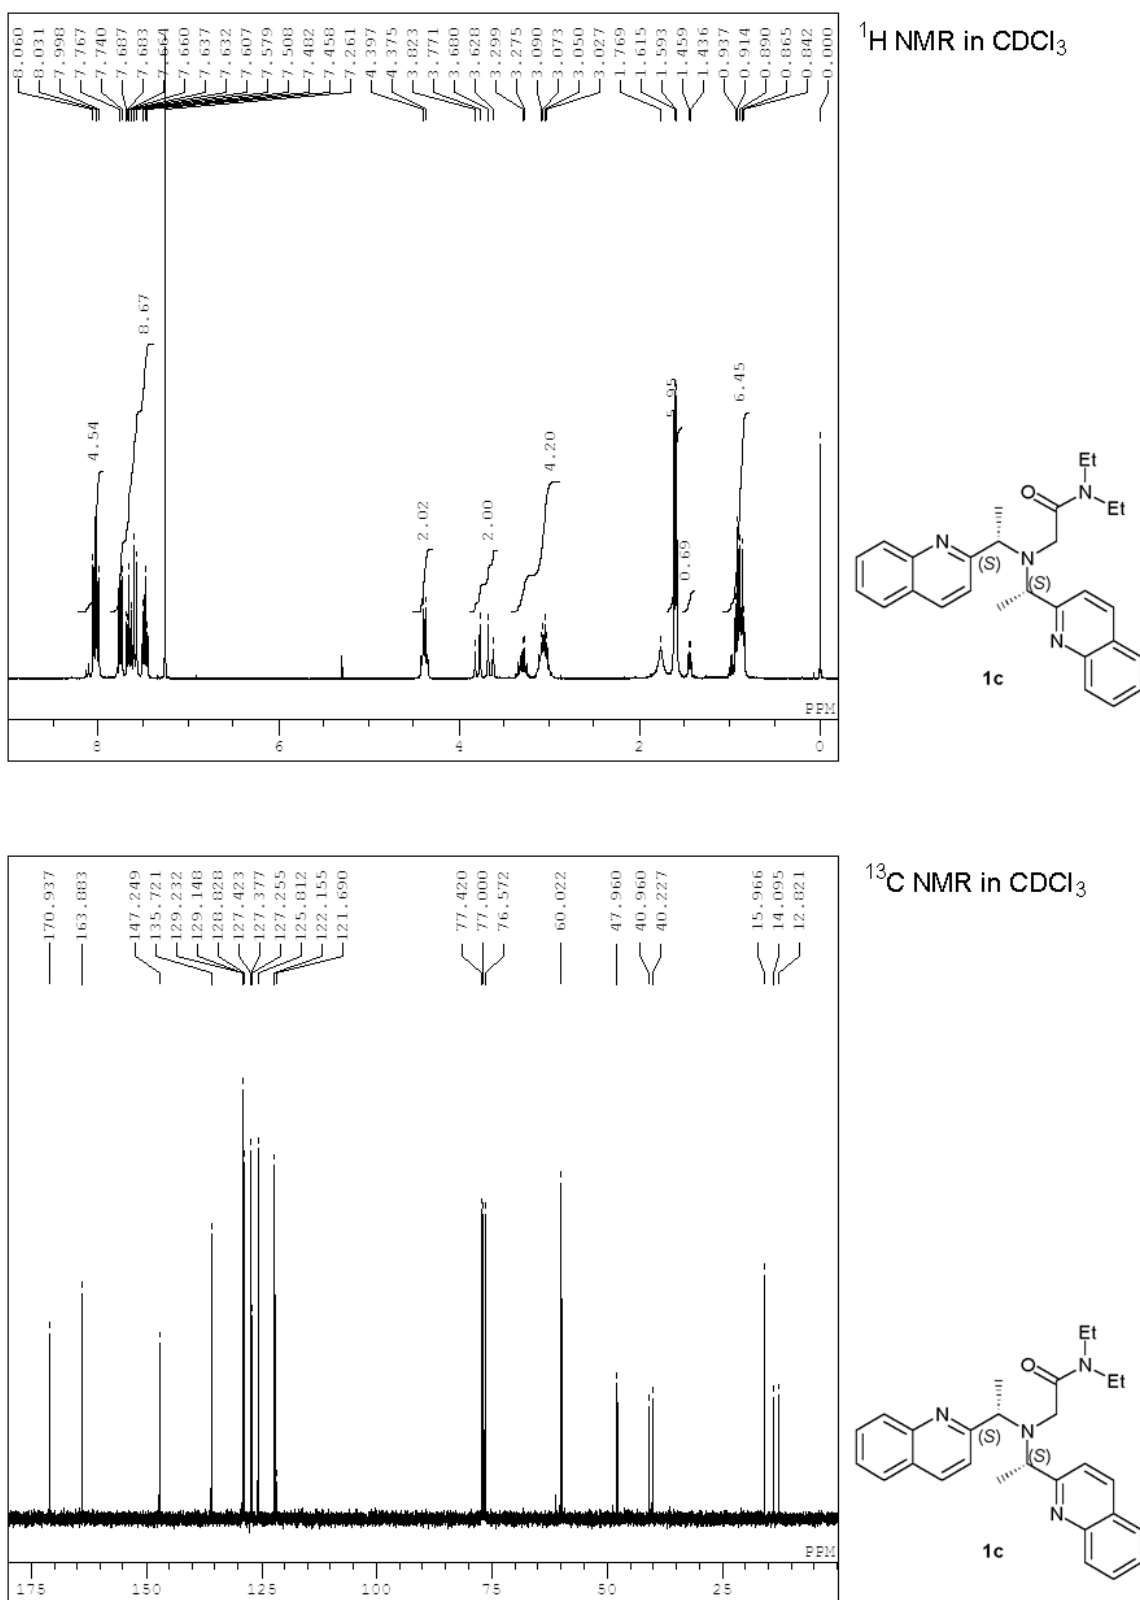

Figure S1. (a) <sup>1</sup>H and <sup>13</sup>C NMR spectra of tripod **1c**.

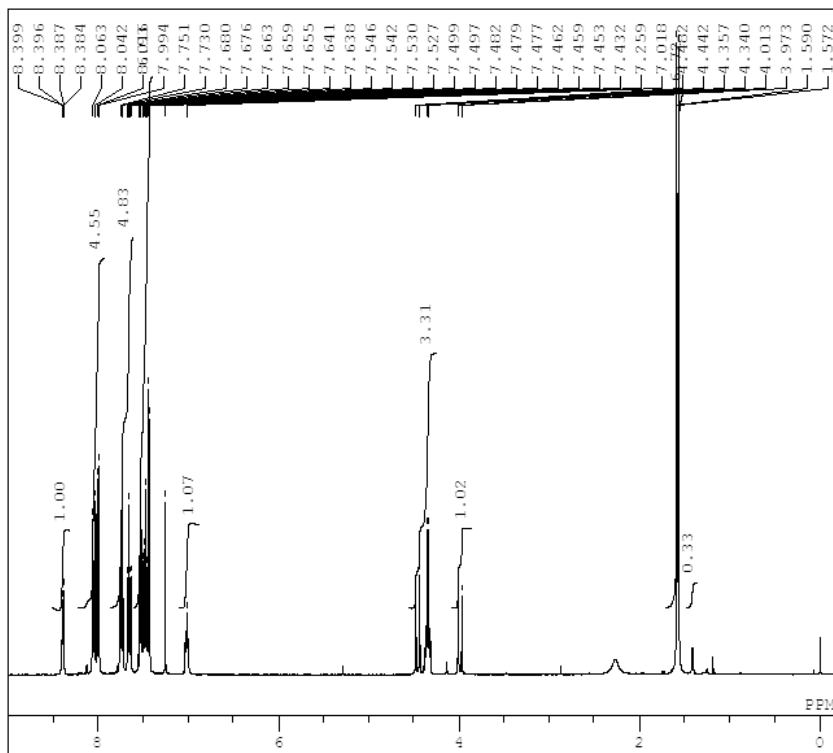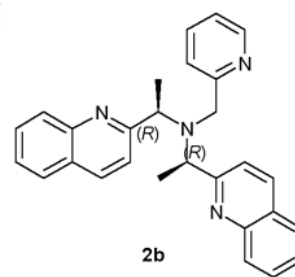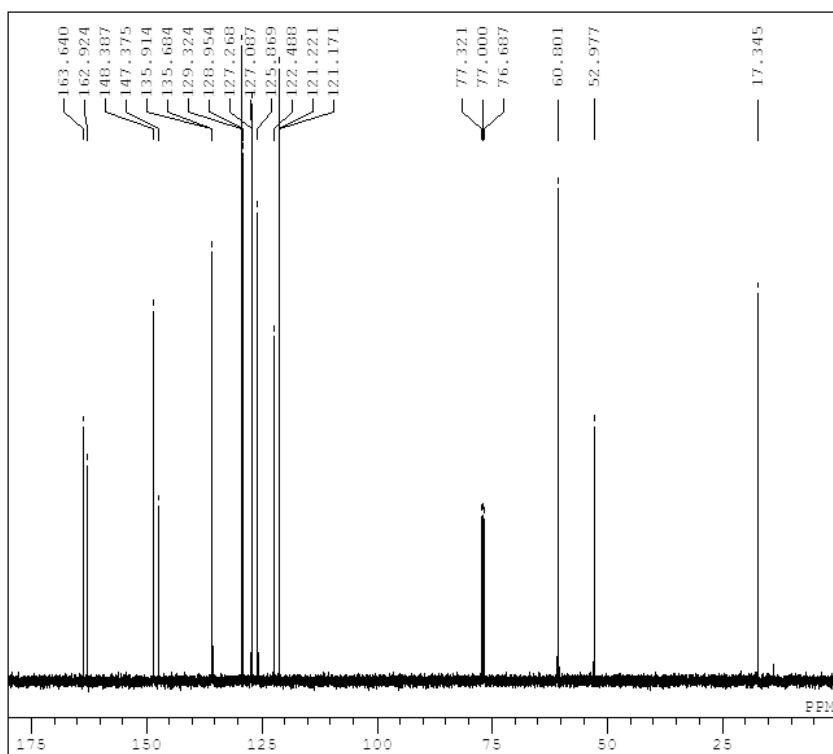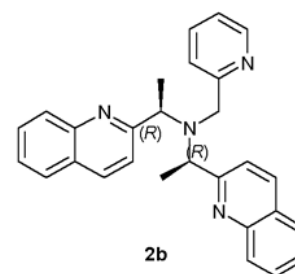

Figure S1. (b) <sup>1</sup>H and <sup>13</sup>C NMR spectra of tripod **2b**.

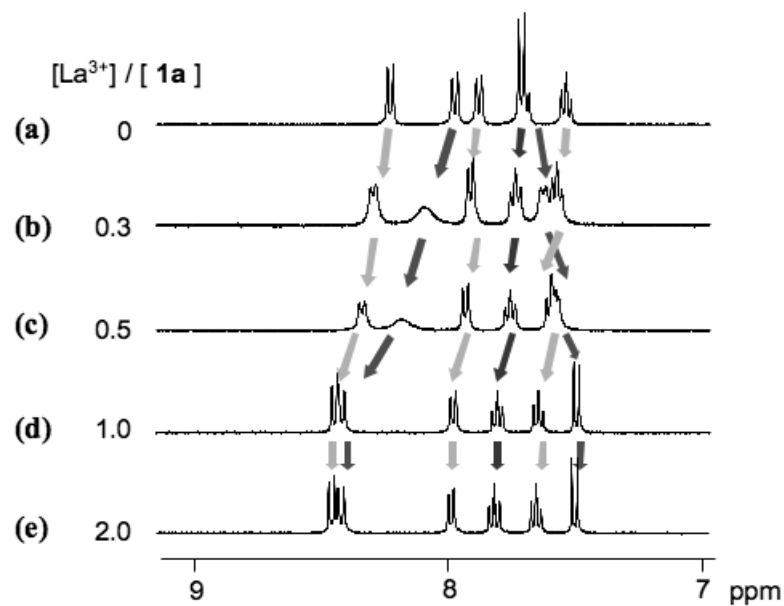

**Figure S2.**  $^1\text{H}$  NMR titration of tripod **1a**– $\text{La}(\text{NO}_3)_3$ .

Conditions: Tripod **1a**,  $4.0 \times 10^{-4}$  mol/L;  $\text{La}(\text{NO}_3)_3$ ; (a) 0 eq.; (b) 0.30 eq.,  $1.2 \times 10^{-4}$  mol/L; (c) 0.50 eq.,  $2.0 \times 10^{-4}$  mol/L; (d) 1.0 eq.,  $4.0 \times 10^{-4}$  mol/L; (e) 2.0 eq.,  $8.0 \times 10^{-4}$  mol/L.

## Details of Stability Constants Measurements

**Ligands.** **1a:** (*N,N*-Diethyl-2- $\{$ bis[(quinolyn-2-yl)methyl]-amino $\}$ ethanamide)  
**1b:** (*(S)*-*N,N*-Diethyl-2- $\{$ bis[(quinolyn-2-yl)methyl]-amino $\}$ propanamide)  
**1c:** (*(S,S)*-*N,N*-Diethyl-bis[1-(quinolyn-2-yl)ethyl]aminoethanamide)  
**2a:** (Bis(2-quinolylmethyl)(2-pyridylmethyl)amine)  
**2b:** (Bis[1-(2-quinolylmethyl)ethyl](2-pyridylmethyl)amine)

**Reagents and Solvent.** The reagents and the solvent for measurements were purchased from the companies shown below and used without further purification.

Europium nitrate hexahydrate (99.9%): Nakarai Tesque Inc.

Lanthanum nitrate hexahydrate (99.9%): Nakarai Tesque Inc.

Terbium nitrate hexahydrate (99.9%): Mitsuwa Pure Chem Inc.

Europium chloride hexahydrate (99.9%): Sigma-Ardrich Inc.

Acetonitrile, fluorescence grade (99.8%) Nakarai Tesque Inc.

**Titration experiments.** UV absorption

**Temperature Range.** 25°C ( $\pm 4$ )

**Datum points.** 15–18 points

**Replicate Measurements.** 2–3 times

**Determination of stepwise formation constants.** The stepwise formation constants  $K_1$  and  $K_2$  for 1 : 1 and 1 : 2 (lanthanide : ligand) complexes are defined by eqs. (a) and (b):

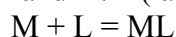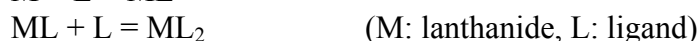

$$K_1 = [ML] / [M][L] \dots\dots\dots (a)$$

$$K_2 = [ML_2] / [ML][L] \dots\dots\dots (b)$$

The total concentration of ligand,  $L_t$ , was kept constants during titration experiments and the total concentration of metal ion,  $M_t$ , increased. The absorbance was plotted against the molar ratio  $X = M_t / L_t$ . The absorbance at the region of  $X$  (from 0 to 3) was well reproduced by assuming only two complex species ( $ML_1$  and  $ML_2$ ).

The total concentrations of  $L_t$  and  $M_t$  are expressed as eqs. (c) and (d):

$$M_t = [M] + [ML] + [ML_2] \dots\dots\dots (c)$$

$$L_t = [L] + [ML] + 2[ML_2] \dots\dots\dots (d)$$

From the eqs. (a) ~ (d), the equilibrium concentrations of free ligand  $[L]$  and other species  $[M]$ ,  $[ML]$ ,  $[ML_2]$  are obtained by solving the following equations:

$$K_1 K_2 [L]^3 + (K_1 + K_1 K_2 L_t + 2K_1 K_2 L_t X) [L]^2 + (1 - K_1 L_t + K_1 L_t X) [L] - L_t = 0$$

$$[M] = L_t X / (1 + K_1 [L] + K_1 K_2 [L]^2)$$

$$[ML] = K_1 [M][L]$$

$$[ML_2] = K_1 K_2 [M][L]^2$$

When the absorbance was measured in a 1-cm quartz cell, the concentration of all species can be expressed as follow:

$$\text{Abs} = \varepsilon_{ML}[ML] + \varepsilon_{ML_2}[ML_2] + \varepsilon_L[L] + \varepsilon_M[M]$$

where  $\varepsilon_y$  is the molar absorption coefficient (in  $L \text{ mol}^{-1} \text{ cm}^{-1}$ ) of the species  $y$ . To fit the titration curve, we treated the following values as variables to be determined:  $K_1$ ,  $K_2$ ,  $\varepsilon_{ML}$  and  $\varepsilon_{ML_2}$ , while  $\varepsilon_L$  and  $\varepsilon_M$  were experimentally determined and used as constants for the curve-fitting.

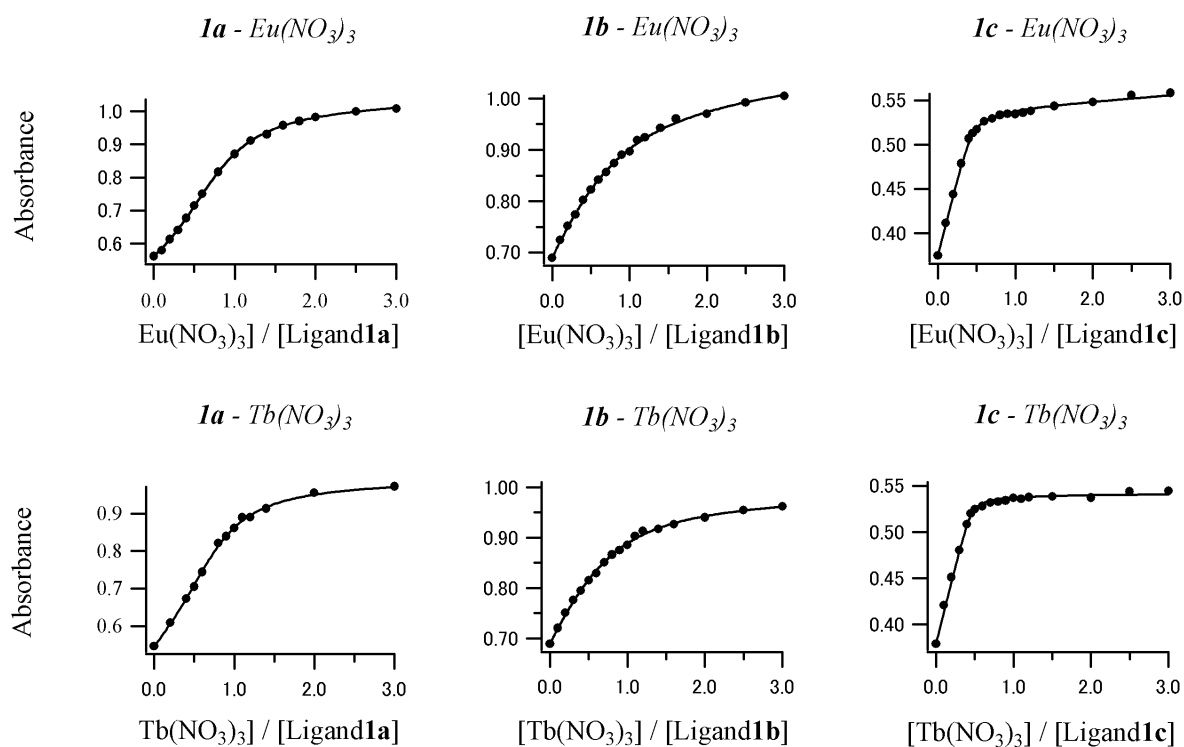

**Figure S3.** UV titration curves of  $\text{Ln}(\text{NO}_3)_3$  complexes with tripode **1a–1c**: solid line, simulation; dots, measurements.

Conditions: Tripode **1a**,  $1.0 \times 10^{-4}$  mol/L;  $\text{Ln}(\text{NO}_3)_3$ ,  $0.10\sim 3.0 \times 10^{-4}$  mol/L (0.10~3.0 eq.), plotted at 307 nm: **1b**,  $1.4 \times 10^{-4}$  mol/L;  $\text{Ln}(\text{NO}_3)_3$ ,  $0.14\sim 4.2 \times 10^{-4}$  mol/L (0.10~3.0 eq.), plotted at 298 nm: **1c**,  $0.80 \times 10^{-4}$  mol/L;  $\text{Ln}(\text{NO}_3)_3$ ,  $0.080\sim 2.4 \times 10^{-4}$  mol/L (0.10~3.0 eq.), plotted at 298 nm.

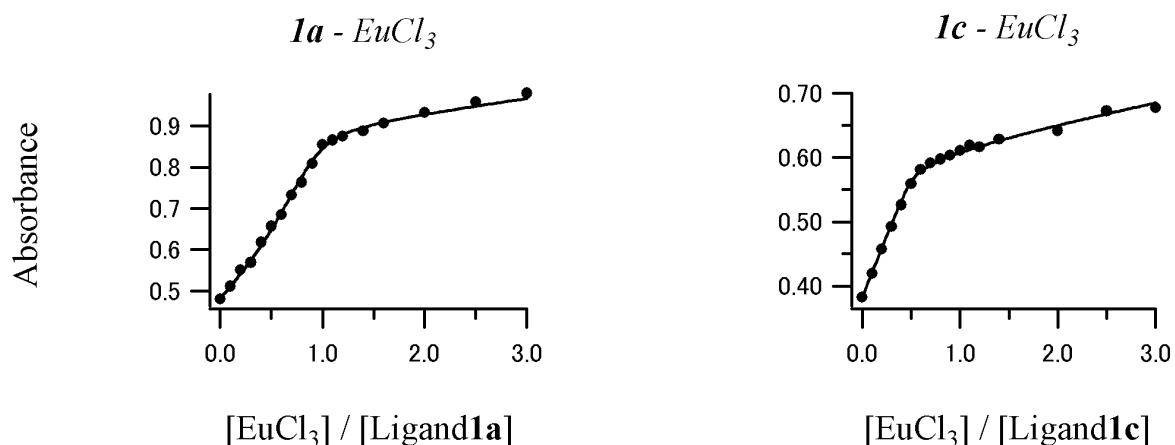

**Figure S4.** UV titration curves of  $\text{EuCl}_3$  complexes with tripodes **1a**, **1c**: solid line, simulations; dots, measurements.

Conditions: Tripode **1a**,  $1.0 \times 10^{-4}$  mol/L;  $\text{EuCl}_3$ ,  $0.10\sim 3.0 \times 10^{-4}$  mol/L (0.10~3.0 eq.), plotted at 298nm: **1c**,  $0.80 \times 10^{-4}$  mol/L;  $\text{EuCl}_3$ ,  $0.080\sim 2.4 \times 10^{-4}$  mol/L (0.10~3.0 eq.), plotted at 298nm.

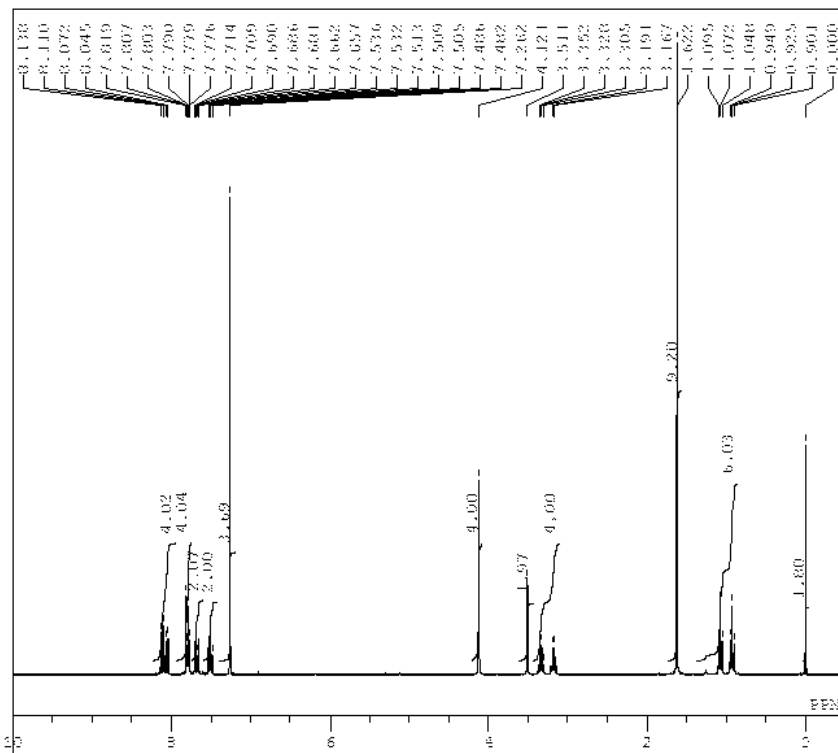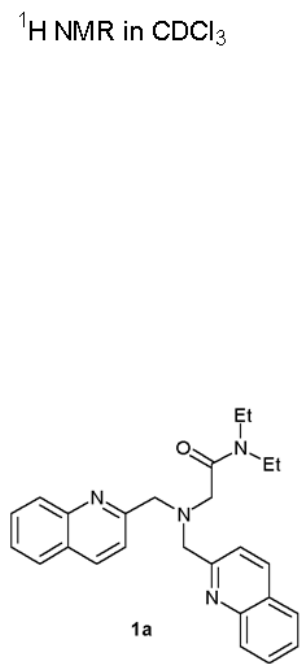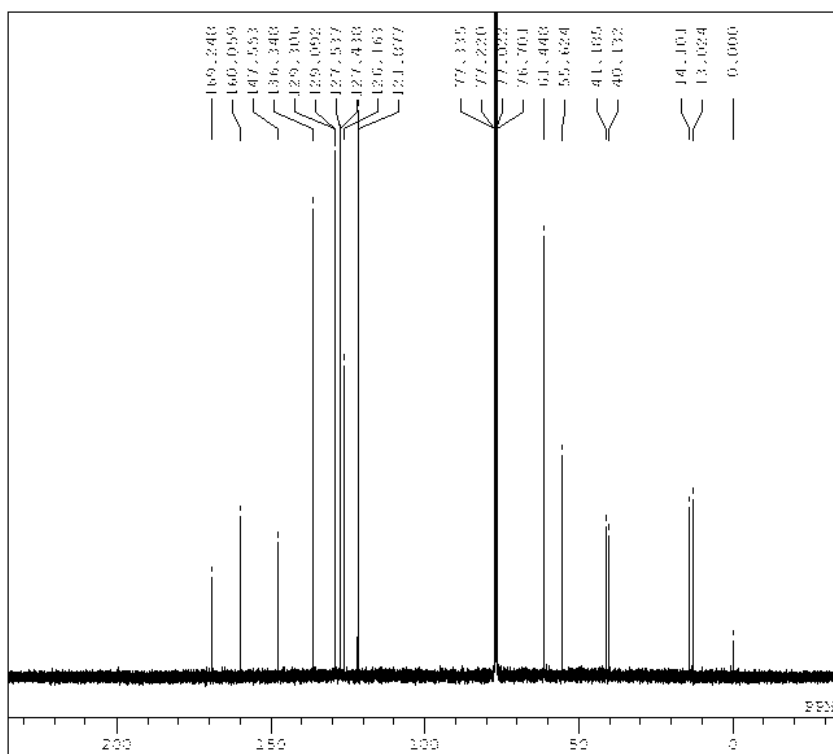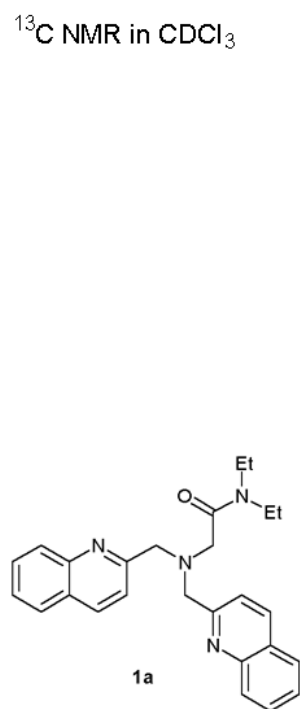

Figure S5. (a) <sup>1</sup>H and <sup>13</sup>C NMR spectra of tripod **1a**.

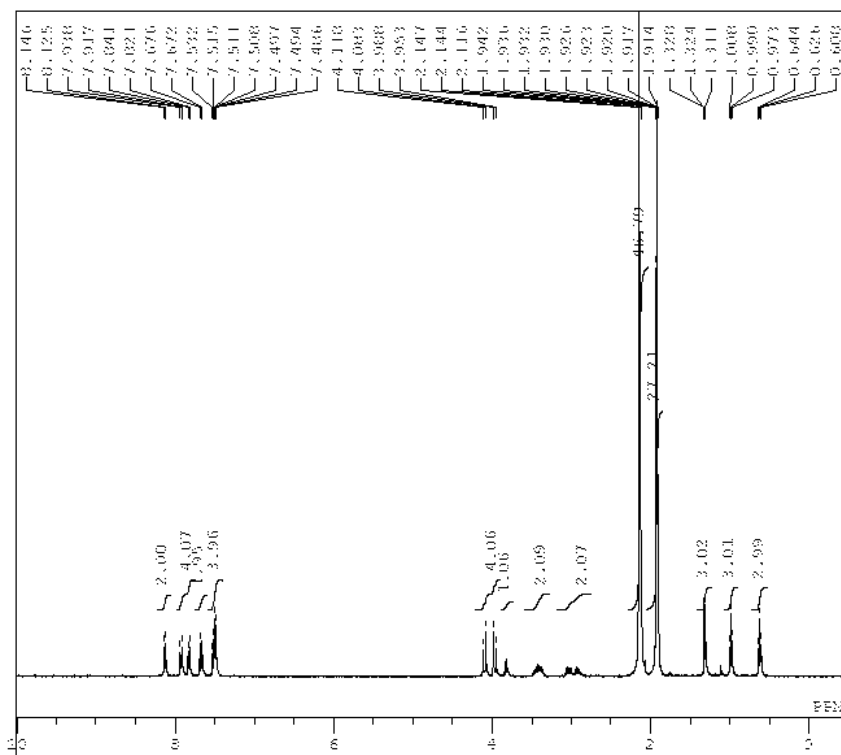

<sup>1</sup>H NMR in CD<sub>3</sub>CN

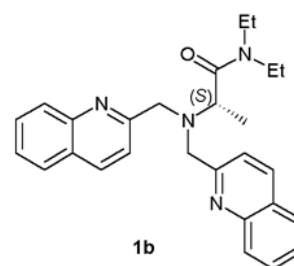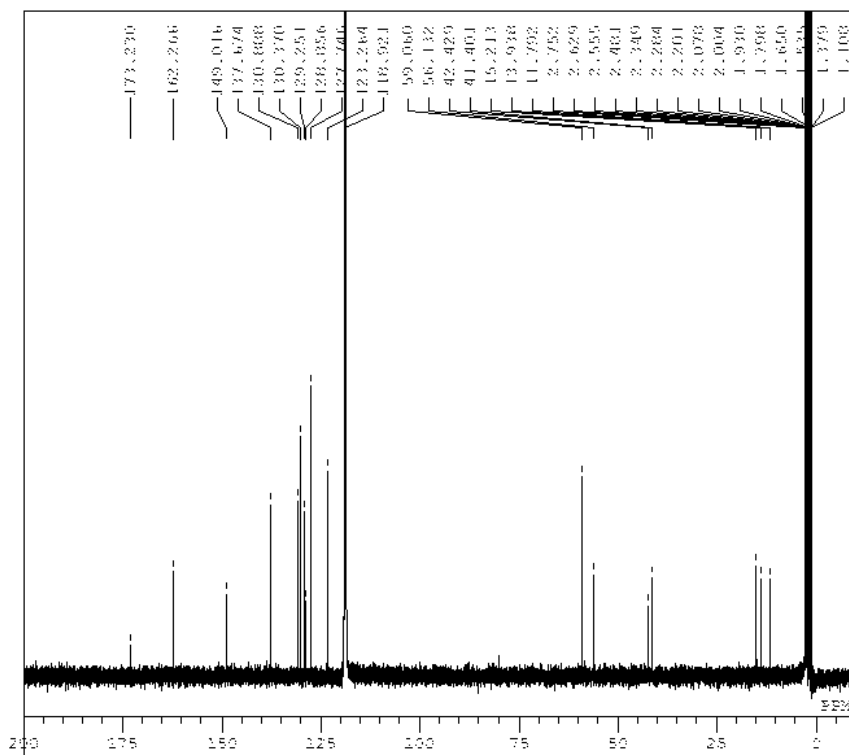

<sup>13</sup>C NMR in CD<sub>3</sub>CN

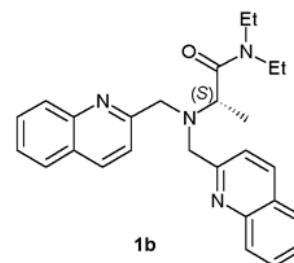

Figure S5. (b) <sup>1</sup>H and <sup>13</sup>C NMR spectra of tripod **1b**.
